# Supplementary material for: Axillary buds are dwarfed shoots that tightly regulate GA pathway and GA-inducible 1,3-β-glucanase genes during branching in hybrid aspen
Source: PubMed Central journal article supplement (PMC5100014; doi:10.1093/jxb/erw352), 2016-10-03
Supplement: supp_erw352_supplementary_figures_S1_S5_tables_S1_S3.pdf [file supp_erw352_supplementary_figures_S1_S5_tables_S1_S3.pdf]

# Supplementary Figure S1

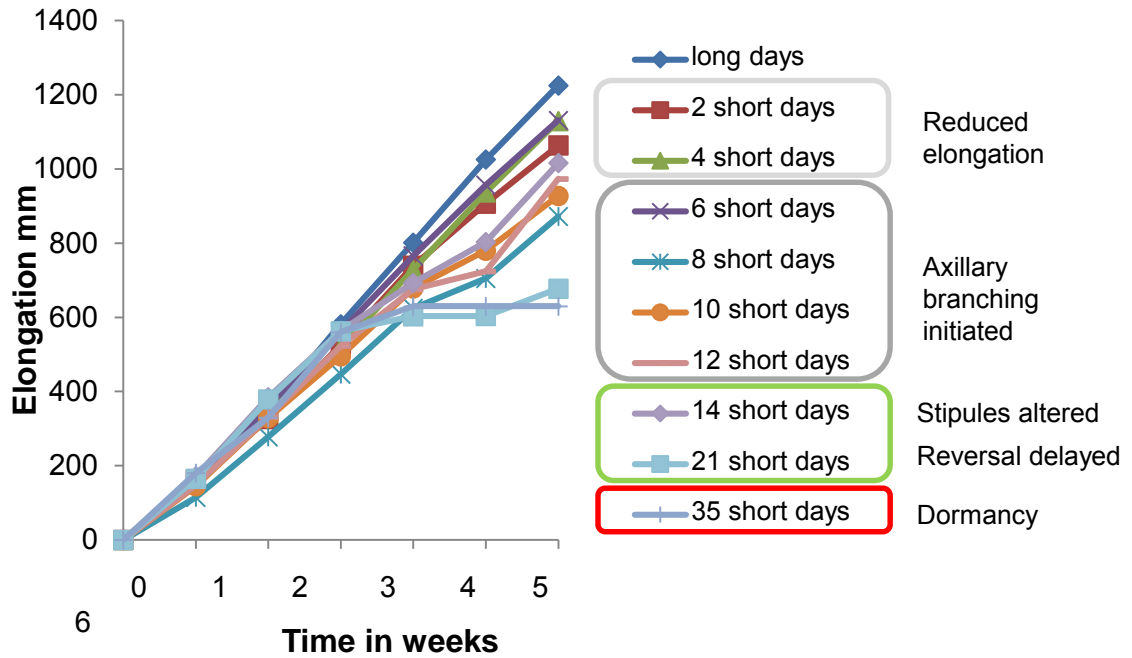

**Supplementary Figure S1.** Reversal of dormancy development and subsequent branching.

Graph shows growth increments (mm) under a long day photoperiod after pre-exposure to a number of inductive short days. Short day exposure as short as 2-4 cycles was only visible as a slightly reduced elongation (light grey legend box). 6-12 reduced growth gradually more substantially but axillary branching from the top axillary buds was initiated (dark grey legend box). 14-21 days left visible marks in the stipules and reversal to normal growth became increasingly difficult (21 cycles) (green legend box). Reversibility is lost between 21-35 cycles, when terminal buds and AXBs have acquired dormancy (red legend box).

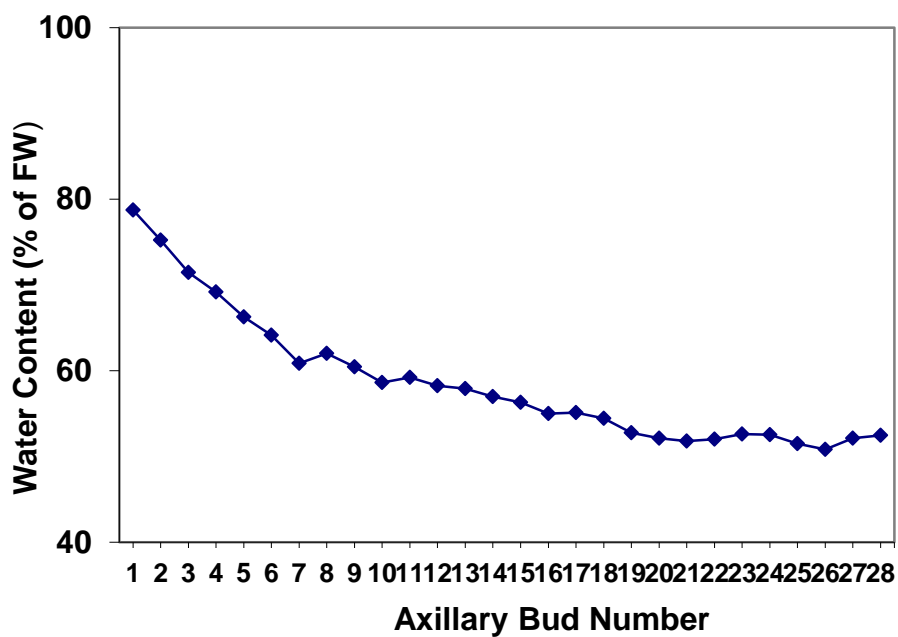

**Supplementary Figure S2.** Developmental desiccation of AXBs.

Water content (% of fresh weight) of AXBs between positions 1 (top) to 28 (base) in current year shoots grown in long days. Water content in developing AXBs (positions 1-12) decreased by 20%, whereas further maturation (positions 11-20) results in an additional 5% decrease. Values represent pooled samples of three plants.

Supplementary Figure S3

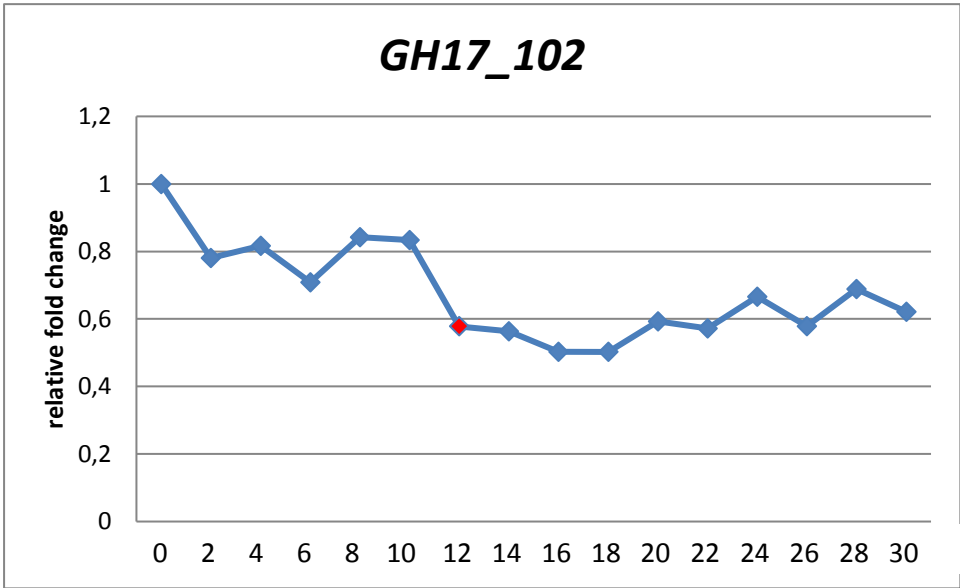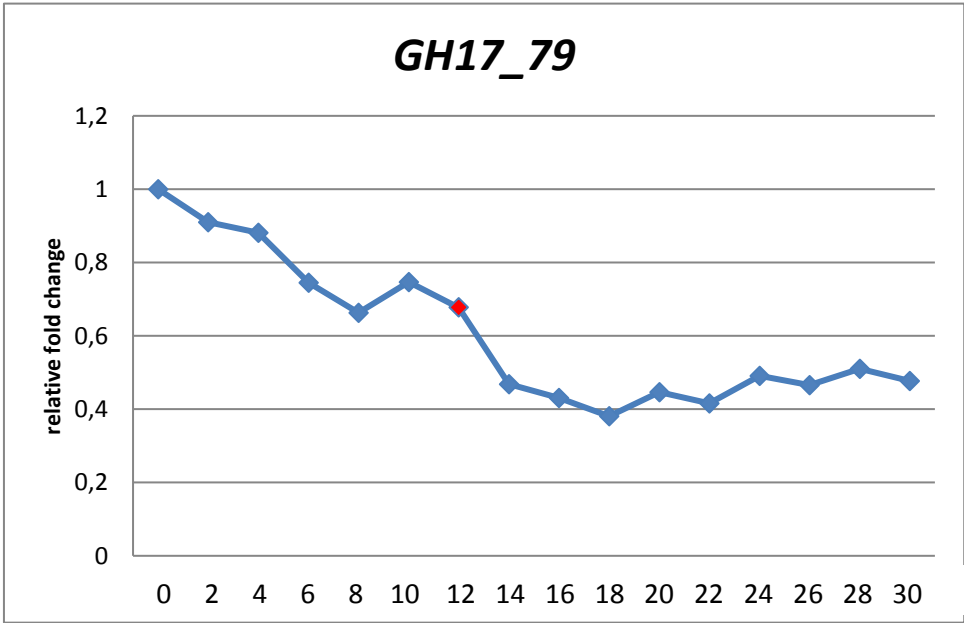

**Supplementary Figure S3.** Expression analyses of *GH17\_102* and *GH17\_79*.

# Supplementary Figure S4

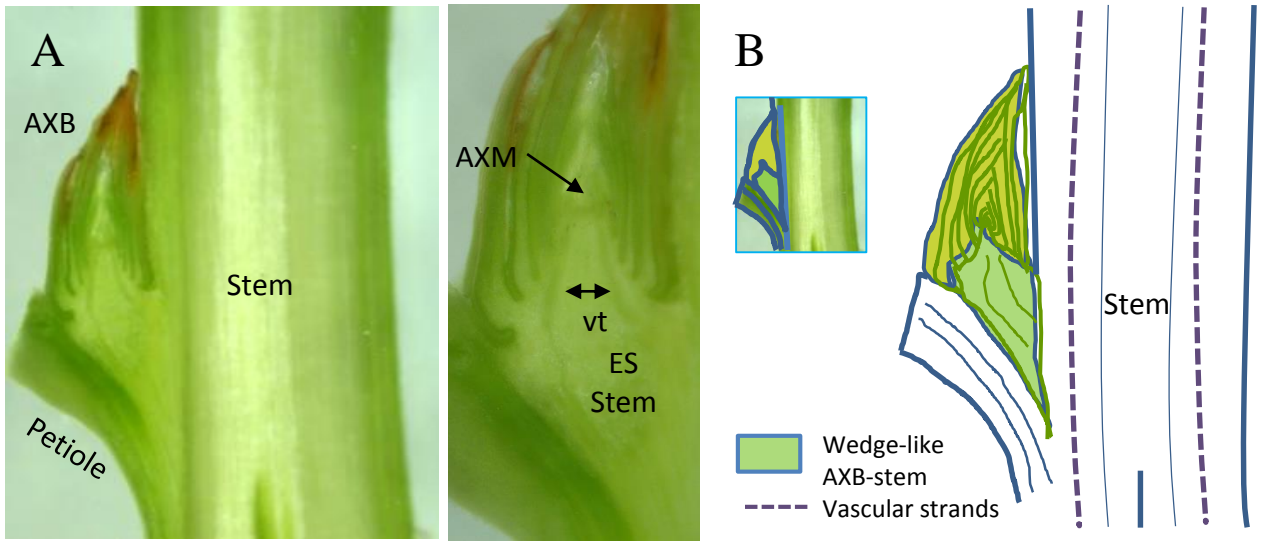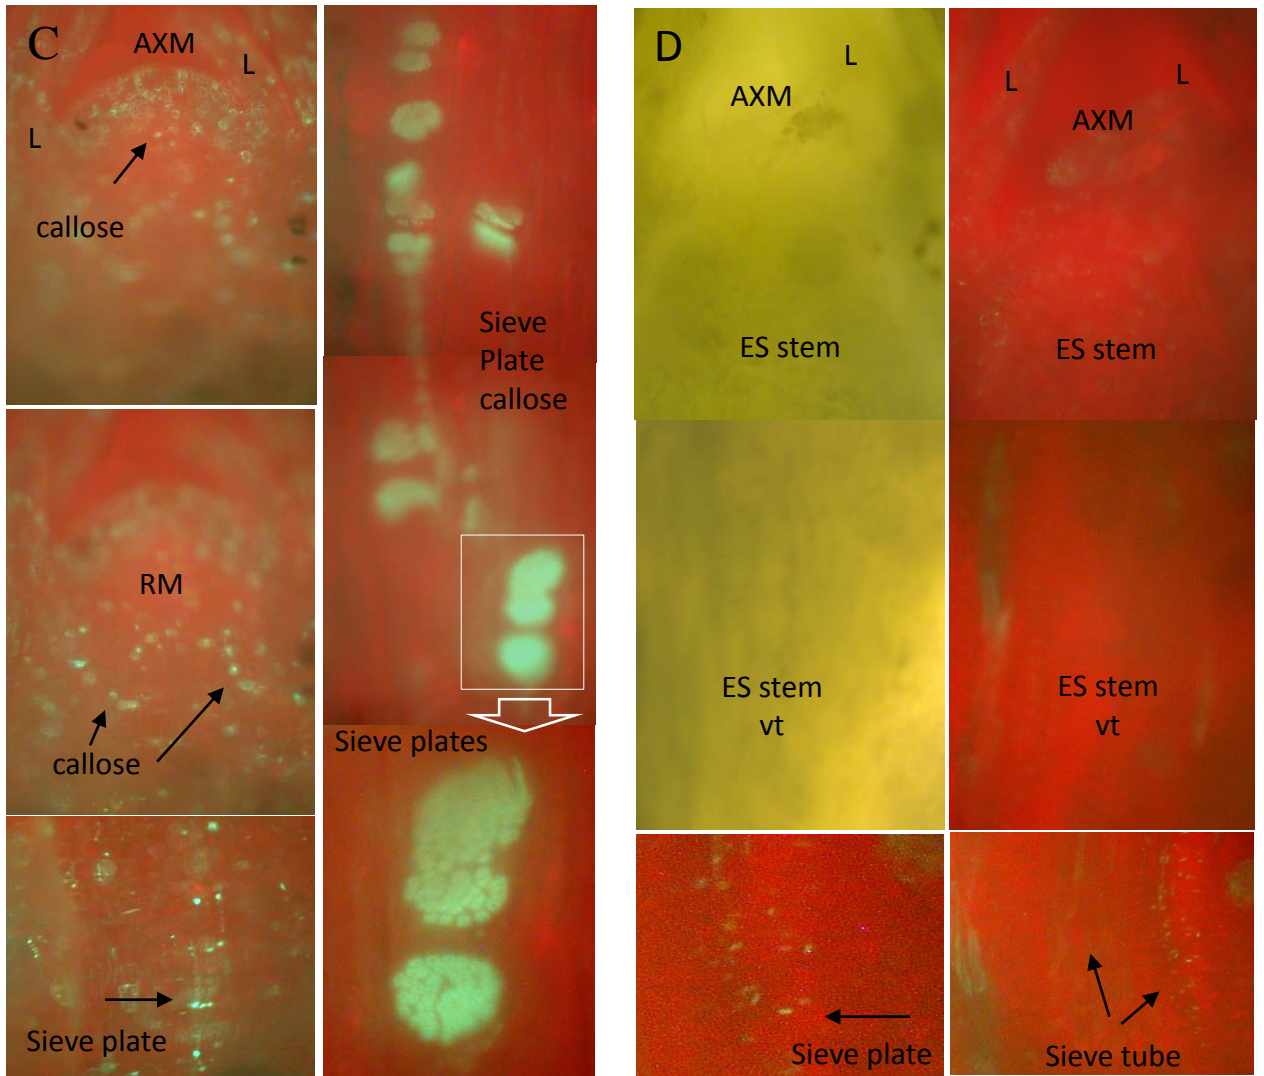

**Supplementary Figure S4.** Callose in para-dormant AXBs and in activated AXBs.

(A) Longitudinal cross-section through a para-dormant AXB, below the BMP. Detail of AXB to the right. (B) AXB is wedged in between the petiole and the main stem. Vascular strands connect the stem of the embryonic shoot to the main stem. (C) Callose deposition in a para-dormant AXB. Left three panels: Callose at plasmodesmata (PD) in the shoot apical meristem (SAM)(upper panel), callose in pro-vascular traces and at PD in some surrounding cells (middle panel), callose in lower embryonic stem at sieve plates and PD in surrounding cells (lower panel). Right panel: sieve plates with heavy callose depositions. (D) Activated AXB below the BMP, three days post isolation of the AXB-node unit. Strongly diminished callose deposits at both sieve plates and PD in the SAM, embryonic stem, and vascular traces (vt).





**Supplementary Table S1.** *P. trichocarpa* genes, identifiers and primer pairs. Gene specific primer sequences for the qPCR analysis were designed using Primer3 ([http://frodo.wi.mit.edu/cgi-bin/primer3/primer3\\_www.cgi](http://frodo.wi.mit.edu/cgi-bin/primer3/primer3_www.cgi)).

| Protein                                                         | Gene abbreviation       | Populus trichocarpa v2.0 | Updated v3.0     | Primers                |                       |
|-----------------------------------------------------------------|-------------------------|--------------------------|------------------|------------------------|-----------------------|
|                                                                 |                         | Locus name               | Locus name       | Forward 5'-3'          | Reverse 5'-3'         |
| <b>GH17-genes</b>                                               |                         |                          |                  |                        |                       |
| beta-1,3-glucanase                                              | <i>GH17_33</i>          | POPTR_0001s45320         | Potri.001G449100 | CAATGCGTATCCCTTTTTCG   | GGAAGTTGCTTTTCGGATCA  |
| beta-1,3-glucanase                                              | <i>GH17_37</i>          | POPTR_0006s04670         | Potri.006G048100 | AATGCGGCTCTATGATCCAG   | CAATCCCTGAAGGTGAGGAG  |
| beta-1,3-glucanase                                              | <i>GH17_39</i>          | POPTR_0001s26210         | Potri.001G255100 | AACCTGGGTTCAAGACAACG   | CGCATCTCCAGGGTGTACTT  |
| beta-1,3-glucanase                                              | <i>GH17_44</i>          | POPTR_0010s15270         | Potri.010G142800 | TGCATTCTCCCGAATAAAC    | GGAAACTGTCGCGTTTTGTT  |
| beta-1,3-glucanase                                              | <i>GH17_61</i>          | POPTR_0004s21250         | Potri.004G202400 | GGCTCGGGAATGAGTACCTT   | AACACCTCGTTTCCGACAGT  |
| beta-1,3-glucanase                                              | <i>GH17_65</i>          | POPTR_0011s15560         | Potri.011G152400 | GCCAAATCAAGGGATTGTTG   | TTGCTAATGCAGAATGCACAG |
| beta-1,3-glucanase                                              | <i>GH17_79</i>          | POPTR_0002s24930         | Potri.002G247900 | TCAAAGACACCGACATCAA    | TTAACCAGTGGTCCGAGAG   |
| PD-cellose binbding protein                                     | <i>GH17_98</i>          | POPTR_0012s06720         | Potri.012G065700 | ATCAAATGGCGCTTGTTC     | AAATCACAGGTGCCTTGAGC  |
| beta-1,3-glucanase                                              | <i>GH17_101</i>         | POPTR_0016s05800         | Potri.016G057600 | AGAGAGGAACCCCAAAGAAG   | AGAAAGATCCCCAATGTTT   |
| beta-1,3-glucanase                                              | <i>GH17_102</i>         | POPTR_0001s04360         | Potri.001G006500 | TGCCATGAACCTCCACA      | GGAAAGGCTTGGGATAATG   |
| <b>Gibberellin biosynthesis, catabolism and signaling genes</b> |                         |                          |                  |                        |                       |
| GA3 oxidase 1                                                   | <i>GA3ox1</i>           | POPTR_0001s17680         | Potri.001G176600 | TGGCTCTCTCTTGAGCATT    | AACCATGTCAACCTCCTTGC  |
| GA3 oxidase 2                                                   | <i>GA3ox2</i>           | POPTR_0003s05610         | Potri.003G057400 | CCCTATCTCGCTCAATCTTCC  | AGTCAAGGTGCTTTGGTGTAG |
| GA 20 oxidase 3                                                 | <i>GA20ox3</i>          | POPTR_0005s20660         | Potri.005G184400 | TCGGATCTCGTTGTGCTAGA   | AGTTCCAATATGGCGAAGGA  |
| GA20 oxidase 4                                                  | <i>GA20ox4</i>          | POPTR_0014s06960         | Potri.014G073700 | TGGCACTCCGTTACTCCTG    | AAAGCGAGGGATTTCTTACT  |
| GA 20 oxidase 6                                                 | <i>GA20ox6</i>          | POPTR_0012s14040         | Potri.012G132400 | ATTTGACGCTTTTGTGCTT    | GAGATTTTCTTGGCGTTTGG  |
| GA 20 oxidase 7                                                 | <i>GA20ox7</i>          | POPTR_0014s06960         | Potri.014G073700 | ATGGCACTCCGTTACTCCTG   | CCACTGCTCTATGCAAGCAA  |
| GA 20 oxidase 8                                                 | <i>GA20ox8</i>          | POPTR_0015s14030         | Potri.015G134600 | ATCAAACCATGCCATCCA     | TGGTGTGGAAGAACTGTGC   |
| GA2 oxidase 1                                                   | <i>GA2ox1</i>           | POPTR_0001s38760         | Potri.001G378400 | TTCTTCTCATTACCGCTCTCTG | TCTACCCAGCCACATCAC    |
| GA2 oxidase 2                                                   | <i>GA2ox2</i>           | POPTR_0002s19260         | Potri.002G191900 | TGCCTTCCAGTTTAAACGA    | GGCAAGACCAGGTGTGGAG   |
| GA2 oxidase 3                                                   | <i>GA2ox3</i>           | POPTR_0004s06380         | Potri.004G065000 | GGACCTCTAACCCITTTGG    | TGGGTTTTCTGAAAAATGG   |
| GA2 oxidase 4                                                   | <i>GA2ox4</i>           | POPTR_0008s10100         | Potri.008G101600 | AGGTAGGGTTCGGAGAGCAT   | GGTAGCGGATCAGGTGTTA   |
| GA2 oxidase 5                                                   | <i>GA2ox5</i>           | POPTR_0010s15950         | Potri.010G149700 | AATGGCCTATTTGTGCTCAC   | TATCTCCAAGTCGCAGAGCA  |
| GA2 oxidase 6                                                   | <i>GA2ox6</i>           | POPTR_0011s09770         | Potri.011G095600 | CAAGCCAGCACTTCAACAGT   | ATTCTCACATGCCTTGACC   |
| GIBBERELLIN INSENSITIVE DWARF1                                  | <i>GID1A</i>            | POPTR_0005s04240         | Potri.005G040600 | ACCGTGGGACTAGCCTTCTT   | ACAACCTCCGAGTTGACAGG  |
| GIBBERELLIN INSENSITIVE DWARF1                                  | <i>GID1B</i>            | POPTR_0014s13170         | Potri.014G135900 | GATCATGTTGATCGCACACC   | GTGCTCAAGGGCTTTTCAAG  |
| DELLA                                                           | <i>DE1/RGL1-related</i> | POPTR_0005s14540         | Potri.017G125200 | GCAAGTCGAGTCCACGTTATC  | AATCCCCTCAGCCGAATG    |
| GIBBERELLIN INDUCIBLE PROTEIN 1                                 | <i>GIP1</i>             | POPTR_0017s11940         | Potri.017G083000 | TGGACCTGGGAGTCTCAAG    | GGAAACGCAGAGGCACCTT   |
| <b>Reference gene actin</b>                                     |                         |                          |                  |                        |                       |
| ACTIN                                                           | <i>ACT</i>              | POPTR_0001s31700         | Potri.001G309500 | CGATGCCGAGGATATTCAAC   | ACCAGTGTGCTTGGTCTACCC |

Supplementary Table S1.

## Supplementary Table S2.

### Supplementary Table S2. Syllepsis-like branching of *GH17* overexpressors.

Sylleptic branching of three *GH17\_44* and three *GH17\_102* overexpression lines. Wild type plants at corresponding age and growth patch as transgenic lines are included for comparison.

| Transgenic lines and wild type | <sup>a</sup> Plant height (no of nodes/plant) | Branching event                                | <sup>a</sup> Nodal positions of branches | Average branch length (cm) |
|--------------------------------|-----------------------------------------------|------------------------------------------------|------------------------------------------|----------------------------|
| Wild type                      | 226 (70)                                      | none                                           | none                                     | -                          |
| <i>GH17_44 OE-9</i>            | 210 (75)                                      | 1 <sup>st</sup> flush<br>2 <sup>nd</sup> flush | 37-46<br>8-23                            | 36.3 (±6.4)<br>17.6 (±7.8) |
| <i>GH17_44 OE-16</i>           | 198 (64)                                      | 1 <sup>st</sup> flush<br>2 <sup>nd</sup> flush | 44-47<br>27                              | 32.0 (±17.2)<br>6.0        |
| <i>GH17_44 OE-18</i>           | 214 (79)                                      | 1 <sup>st</sup> flush<br>2 <sup>nd</sup> flush | 22-29<br>14-17                           | 13.3 (±6.3)<br>2.4 (±0.2)  |
| Wild type                      | 36 (26)                                       | none                                           | none                                     | -                          |
| <i>GH17_102 OE-8</i>           | 19 (20)                                       | 1 <sup>st</sup> flush                          | 11-18                                    | ≤2                         |
| <i>GH17_102 OE-12</i>          | 24 (21)                                       | 1 <sup>st</sup> flush                          | 9-16                                     | ≤2                         |
| <i>GH17_102 OE-13</i>          | 26 (24)                                       | 1 <sup>st</sup> flush                          | 10-20                                    | ≤2                         |

<sup>a</sup>All height and length values are measured in cm.

<sup>b</sup>Nodal positions are counted from the apex of plant

<sup>c</sup>Values in parenthesis represent minimum to maximum range



## Supplementary Table S3.

Supplementary Table S3. Analysis of putative promoter regions of GH17 genes.

Sequences were analyzed using publicly available database of plant cis-acting regulatory DNA elements (<http://www.dna.affrc.go.jp/PLACE/>) (Higo et al. 1999), and selected DNA elements are presented. Cell wall related GPI-anchored GH17 members are marked with GPI, some possessing an addition callose binding motif (CBM43). The GH17 proteins without signal sequence may associate with lipid bodies (LB).

| Function                        | DNA element     | Accession<br>no | GH17_79     | GH17_98        | GH17_102    | GH17_33     | GH17_65     | GH17_37     | GH17_39     | GH17_44     | GH17_101    | GH17_61     |
|---------------------------------|-----------------|-----------------|-------------|----------------|-------------|-------------|-------------|-------------|-------------|-------------|-------------|-------------|
|                                 |                 |                 | CBM43       | CBM43 +<br>GPI | CBM+GPI     | GPI         | GPI         | LB          | LB          | LB          | LB          | GPI         |
|                                 |                 |                 | No of sites | No of sites    | No of sites | No of sites | No of sites | No of sites | No of sites | No of sites | No of sites | No of sites |
| Auxin response factor           | ASF1MOTIFCAMV   | S000024         | 1           | --             | 3           | 1           | --          | --          | --          | --          | 1           | 1           |
|                                 | CATATGGMSAUR    | S000370         | 2           | 6              | 4           | --          | --          | --          | --          | --          | --          | 2           |
|                                 | SEBFCONSSTPR10A | S000391         | 1           | 1              | 2           | 2           | 1           | --          | --          | --          | --          | 1           |
| Vascular expression             | BS1EGCCR        | S000352         | 1           | --             | 1           | --          | --          | --          | --          | --          | --          | --          |
|                                 | XYLAT           | S000510         | --          | --             | 2           | --          | --          | --          | 1           | --          | --          | --          |
| Gibberellin activity            | GARE1OSREP1     | S000419         | 1           | 1              | 2           | --          | --          | --          | --          | --          | --          | --          |
|                                 | GAREAT          | S000439         | --          | --             | 1           | 1           | 1           | 2           | 1           | --          | --          | 1           |
|                                 | MYBGAHV         | S000181         | --          | --             | 1           | --          | --          | 2           | --          | --          | --          | 1           |
|                                 | TATCCACHVAL21   | S000416         | --          | --             | 1           | 1           | --          | --          | --          | --          | --          | --          |
| Meristem specific<br>expression | L1BOXATPDF1     | S000386         | --          | 1              | --          | --          | --          | --          | --          | 2           | 1           | --          |
|                                 | LEAFYATAG       | S000432         | --          | --             | 1           | --          | --          | --          | 1           | --          | --          | --          |
|                                 | WUSATAg         | S000433         | --          | --             | 1           | --          | --          | --          | 1           | --          | 1           | 1           |
| Axillary bud outgrowth          | SREATMSD        | S000470         | 1           | --             | --          | --          | 1           | 2           | 2           | 3           | 1           | 1           |
|                                 | UP2ATMSD        | S000472         | --          | --             | 1           | --          | --          | --          | --          | --          | --          | --          |
| Phosphate starvation            | P1BS            | S000459         | --          | --             | 4           | --          | --          | --          | 2           | 2           | --          | --          |
